# Supplementary material for: A facile green and one-pot synthesis of grape seed-derived carbon quantum dots as a fluorescence probe for Cu(ii) and ascorbic acid
Source: Royal Society of Chemistry journal article supplement (doi:10.1039/d1ra05656e), 2021-01-01
Supplement: d1ra05656e1.pdf [file d1ra05656e1.pdf]

## Support materials

Facile green and one-pot synthesis of Grape seeds derived carbon quantum dot as a fluorescence probe for Cu(II) and ascorbic acid

Jiawei Li, Ouwen Xu and . Xiashi Zhu .

School of Chemistry & Chemical Engineering, College of Guangling, Yangzhou University, Yangzhou, 225002, PR China

\*corresponding email address: [xszhu@yzu.edu.cn](mailto:xszhu@yzu.edu.cn); [zhuxiashi@sina.com](mailto:zhuxiashi@sina.com) (X.S. Zhu)

**Table S1.** Fluorescence quenching constant of different temperature

| T        | 20°C  | 40°C  | 60°C  |
|----------|-------|-------|-------|
| $K_{SV}$ | 0.812 | 0.736 | 0.721 |

**Table S1.** Calculation results of Fluorescence quenching constant in different temperature

Table S2 Thermodynamic calculation

| Temperature T/K | $\Delta H^\ominus/(\text{J}\cdot\text{mol}^{-1})$ | $\Delta S^\ominus/(\text{J}\cdot\text{mol}^{-1}\cdot\text{k}^{-1})$ |
|-----------------|---------------------------------------------------|---------------------------------------------------------------------|
| 293.15          | -1702.83                                          | 8.549                                                               |

**Table S2.** Calculation results of Fluorescence quenching Thermodynamic calculation
